# Supplementary material for: Glutathione as a photo-stabilizer of avobenzone: an evaluation under glass-filtered sunlight using UV-spectroscopy
Source: Royal Society of Chemistry journal article supplement (doi:10.1039/c8pp00343b), 2018-10-31
Supplement: c8pp00343b1.pdf [file c8pp00343b1.pdf]

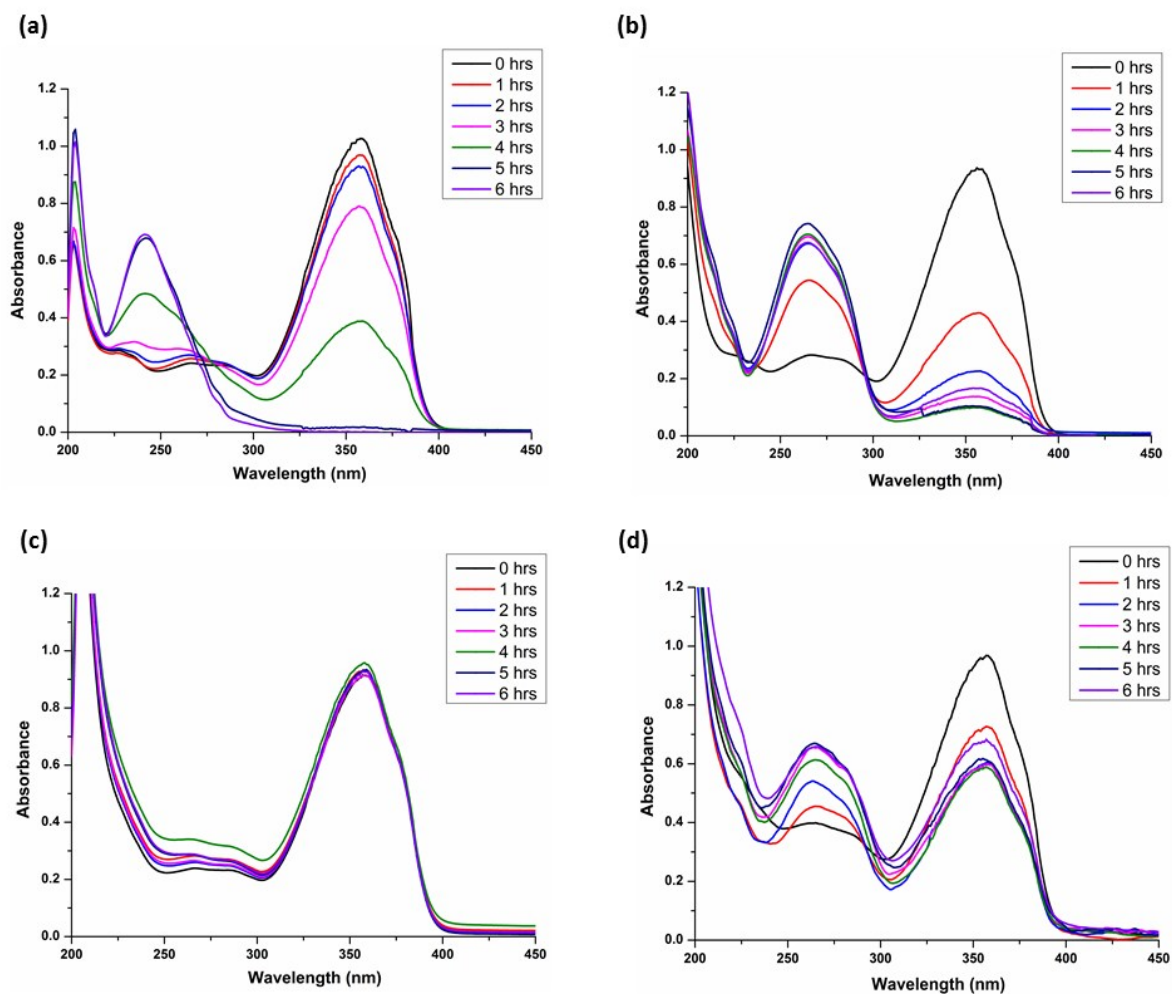

**Figure-S1.** Glass-filtered sunlight induced photodegradation of avobenzone during peak summer session at Central University of Karnataka. UV spectra of avobenzone alone in (a) ethanol and (b) acetonitrile drawn at regular intervals of time from solution constantly exposed to the glass-filtered sunlight. UV spectra of avobenzone in presence of glutathione in (c) ethanol and (d) acetonitrile drawn at regular intervals of time from solution constantly exposed to the glass-filtered sunlight. Note that the experiments were conducted on the same day under identical conditions of glass-filtered sunlight.
