# Supplementary material for: Glutathione as a photo-stabilizer of avobenzone: an evaluation under glass-filtered sunlight using UV-spectroscopy
Source: Royal Society of Chemistry journal article supplement (doi:10.1039/c8pp00343b), 2018-10-31
Supplement: c8pp00343b2.pdf [file c8pp00343b2.pdf]

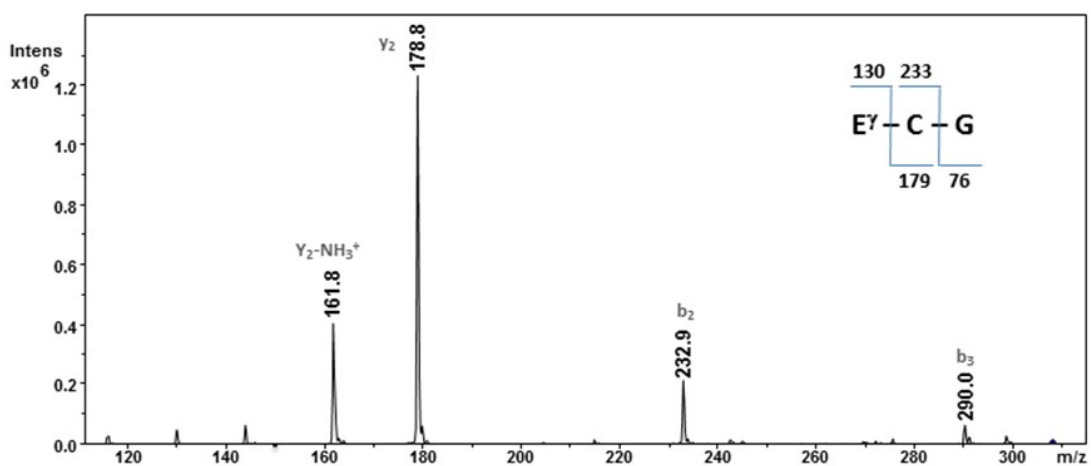

**Figure S2.** ESI-MS/MS of glutathione. Insert shows expected fragment ions. Observed fragment ions are indicated.
