# Supplementary material for: Glutathione as a photo-stabilizer of avobenzone: an evaluation under glass-filtered sunlight using UV-spectroscopy
Source: Royal Society of Chemistry journal article supplement (doi:10.1039/c8pp00343b), 2018-10-31
Supplement: c8pp00343b3.pdf [file c8pp00343b3.pdf]

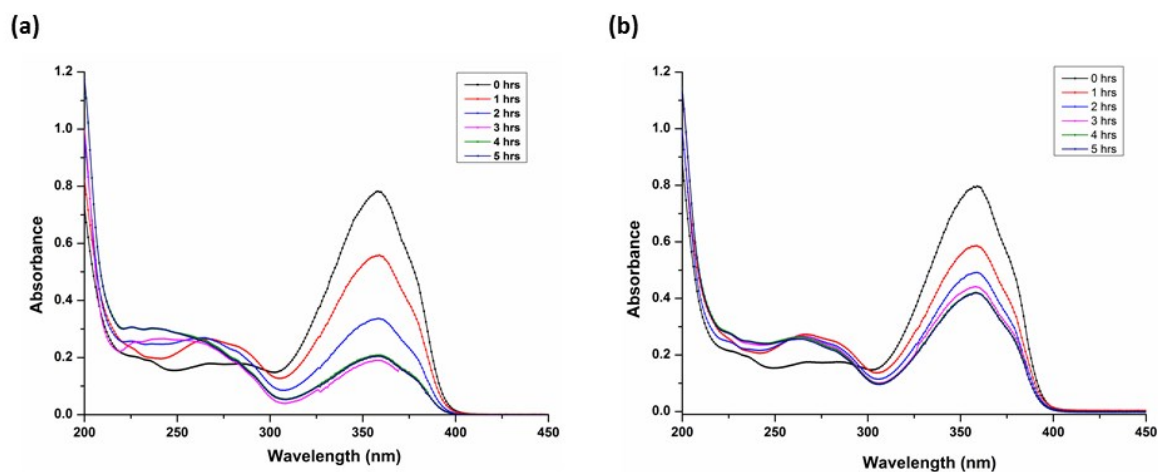

**Figure-S3.** Assessing the ability of  $\beta$ -mercaptoethanol to protect avobenzene from sunlight induced degradation under identical conditions of sunlight in acetonitrile. UV spectra of (a) avobenzene and (b) avobenzene in presence of  $\beta$ -mercaptoethanol at regular intervals of time.
